# Supplementary material
Source: Springer Nature journal article supplement (https://www.springermedizin.de/resource/supplementary/12889_2010_2374_MOESM2_ESM.pdf/9485588)

**TOTAL:****ALL PRACTICES**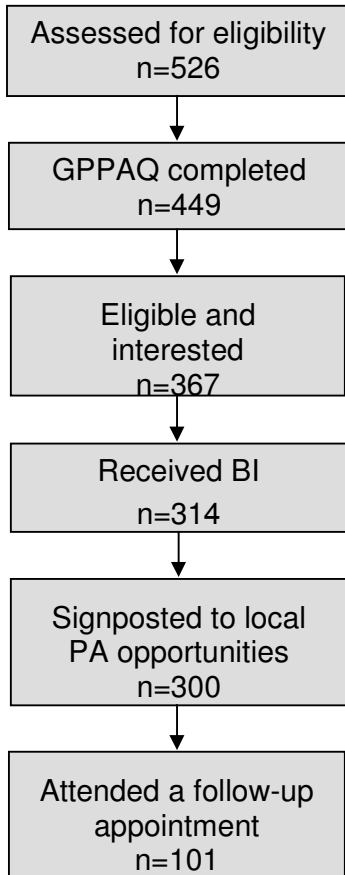**BY RECRUITMENT METHOD:****OPPORTUNISTIC**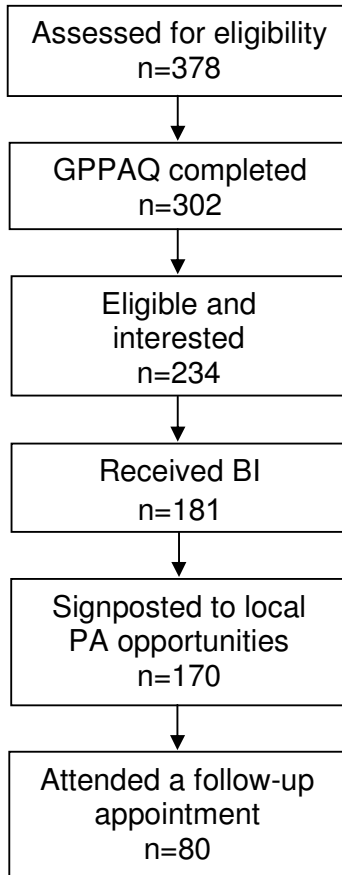**DISEASE REGISTER**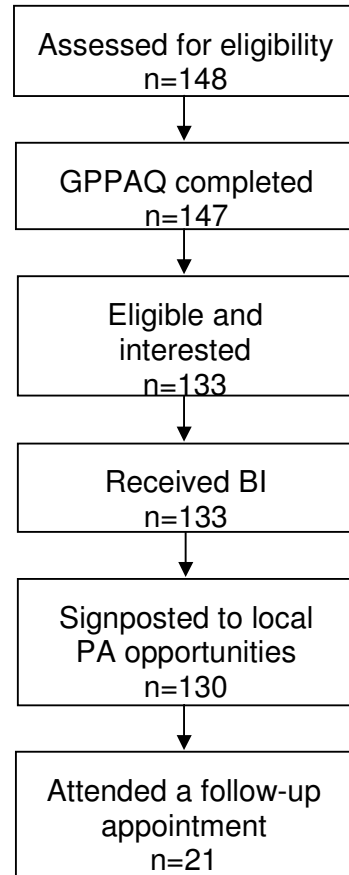

Supplement: MOESM2 [file 9485588]
